# Supplementary material
Source: HighWire-hosted journal article supplement (https://www.genetics.org/content/suppl/2010/06/02/genetics.110.116582)
Supplement: FigureS2.pdf [file FigureS2.pdf]

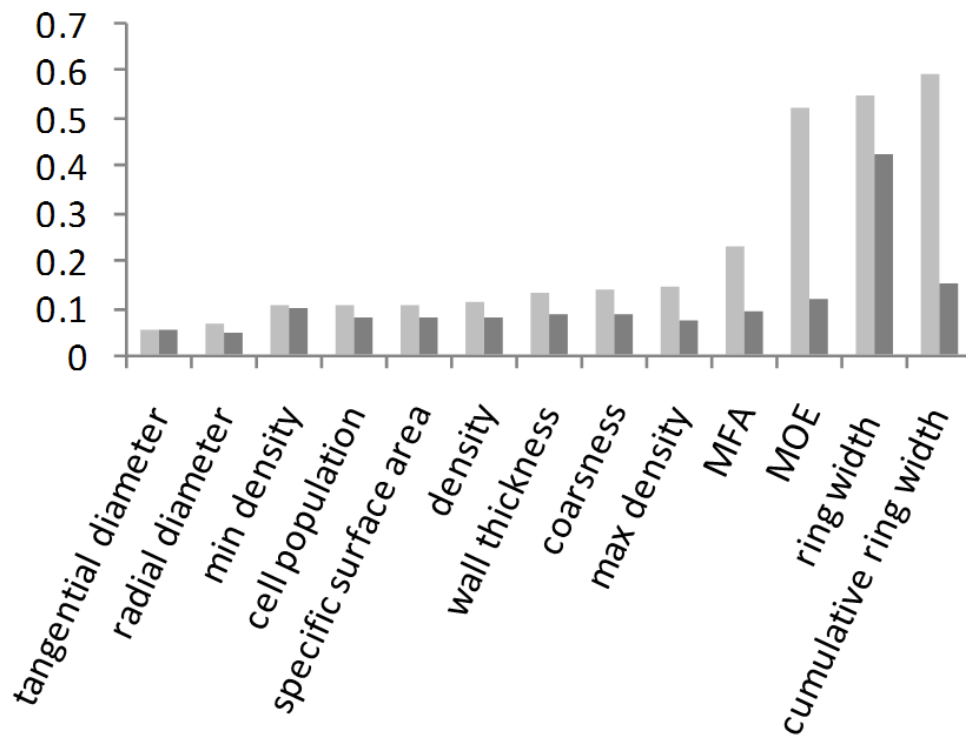

FIGURE S2.—Coefficient of variation calculated for the juvenile (light grey) and mature (dark grey) components of the core for 13 primary traits.
